# Supplementary material
Source: PubMed Central journal article supplement (PMC4994910)
Supplement: Table_S1.pdf [file Table_S1.pdf]

**Supplementary Table 1.** Detection limit of each pathogen in the liquid chip assay.

| <b>Pathogen</b> | <b>DNA (copies/<math>\mu</math>L)</b> | <b>Sputum (copies/mL)</b> |
|-----------------|---------------------------------------|---------------------------|
| SARS            | $10^3$                                | /                         |
| H5N1            | $10^3$                                | /                         |
| Flu-A           | $10^3$                                | /                         |
| HBoV            | $10^4$                                | /                         |
| HMPV            | $10^4$                                | /                         |
| HCMV            | $10^3$                                | /                         |
| AD              | $10^3$                                | /                         |
| PIV1            | $10^1$                                | /                         |
| PIV2            | $10^1$                                | /                         |
| PIV3            | $10^2$                                | /                         |
| RSV             | $10^3$                                | /                         |
| MP              | $10^3$                                | $1.67 \times 10^5$        |
| CP              | $10^4$                                | $1.67 \times 10^6$        |
| SA              | $10^3$                                | $1.67 \times 10^5$        |
| SP              | $10^2$                                | $1.67 \times 10^4$        |
| KP              | $10^3$                                | $1.67 \times 10^5$        |
| AB              | $10^3$                                | $1.67 \times 10^5$        |
| PA              | $10^0$                                | $1.67 \times 10^2$        |
| SM              | $10^1$                                | $1.67 \times 10^3$        |
