# Supplementary material
Source: PubMed Central journal article supplement (PMC4994910)
Supplement: Table_S2.pdf [file Table_S2.pdf]

**Supplementary Table 2.** Fluorescent signal values of testing pathogens of acute respiratory infection on xMAP fluid bead-based suspension array.

| Sample   | SP         | MP         | SM          | CP         | SA         | KP         | PA          | AB         | HCMV       | AD          | PIV1       | PIV2       | PIV3        | RSA         | FuIA | H5          | N1         | SARS       | HBOV       | HMPV       |
|----------|------------|------------|-------------|------------|------------|------------|-------------|------------|------------|-------------|------------|------------|-------------|-------------|------|-------------|------------|------------|------------|------------|
| Negative | 41         | 65         | 82          | 82         | 27         | 43         | 41          | 33         | 67         | 59          | 62         | 55         | 37          | 44          | 46   | 64          | 44         | 47         | 28         | 31         |
| SP       | <b>650</b> | 62         | 54          | 52         | 42         | 66         | 112         | 55         | 27         | 49          | 79         | 53         | 54          | 47          | 52   | 40          | 18         | 51         | 43         | 25         |
| MP       | 48         | <b>364</b> | 45          | 37         | 49         | 49         | 131         | 80         | 63         | 27          | 65         | 59         | 46          | 48          | 69   | 33          | 46         | 68         | 73         | 33         |
| SM       | 53         | 38         | <b>2371</b> | 49         | 36         | 49         | 130         | 49         | 27         | 48          | 58         | 60         | 46          | 46          | 27   | 61          | 50         | 40         | 52         | 55         |
| CP       | 50         | 46         | 40          | <b>588</b> | 47         | 25         | 108         | 73         | 18         | 55          | 44         | 46         | 43          | 45          | 31   | 66          | 58         | 50         | 58         | 57         |
| SA       | 51         | 40         | 30          | 92         | <b>361</b> | 22         | 125         | 29         | 41         | 46          | 47         | 57         | 26          | 35          | 60   | 54          | 32         | 34         | 55         | 40         |
| KP       | 55         | 46         | 44          | 34         | 59         | <b>805</b> | 68          | 68         | 47         | 25          | 36         | 45         | 53          | 40          | 70   | 53          | 23         | 67         | 70         | 52         |
| PA       | 23         | 40         | 44          | 63         | 52         | 45         | <b>1257</b> | 38         | 55         | 50          | 56         | 48         | 29          | 38          | 78   | 31          | 79         | 54         | 44         | 79         |
| AB       | 26         | 37         | 50          | 31         | 47         | 54         | 78          | <b>285</b> | 52         | 40          | 42         | 45         | 51          | 29          | 43   | 59          | 67         | 51         | 49         | 71         |
| HCMV     | 41         | 38         | 27          | 34         | 40         | 37         | 29          | 43         | <b>405</b> | 63          | 65         | 53         | 43          | 107         | 35   | 50          | 58         | 79         | 53         | 54         |
| AD       | 42         | 42         | 29          | 43         | 55         | 32         | 34          | 31         | 103        | <b>1319</b> | 42         | 65         | 38          | 92          | 38   | 73          | 67         | 47         | 61         | 67         |
| PIV1     | 38         | 35         | 34          | 31         | 39         | 37         | 25          | 70         | 96         | 66          | <b>505</b> | 73         | 55          | 98          | 39   | 98          | 67         | 55         | 84         | 97         |
| PIV2     | 29         | 39         | 25          | 70         | 38         | 24         | 41          | 43         | 111        | 83          | 51         | <b>843</b> | 50          | 105         | 66   | 84          | 59         | 71         | 80         | 63         |
| PIV3     | 20         | 40         | 41          | 43         | 40         | 25         | 29          | 47         | 123        | 90          | 57         | 75         | <b>2605</b> | 92          | 67   | 58          | 79         | 47         | 101        | 85         |
| RSV      | 36         | 30         | 29          | 47         | 43         | 28         | 34          | 43         | 128        | 79          | 54         | 64         | 61          | <b>1240</b> | 54   | 56          | 51         | 41         | 111        | 67         |
| FuIA     | 71         | 43         | 16          | 46         | 88         | 30         | 60          | 73         | 45         | 43          | 41         | 41         | 31          | 65          | 241  | 72          | 60         | 58         | 66         | 73         |
| H5       | 58         | 37         | 54          | 51         | 25         | 42         | 45          | 73         | 29         | 23          | 64         | 66         | 34          | 25          | 37   | <b>1200</b> | 37         | 64         | 59         | 75         |
| N1       | 53         | 64         | 30          | 34         | 90         | 36         | 41          | 47         | 72         | 31          | 53         | 43         | 42          | 94          | 39   | 52          | <b>731</b> | 43         | 99         | 47         |
| SARS     | 67         | 43         | 52          | 46         | 111        | 51         | 46          | 49         | 26         | 60          | 67         | 45         | 44          | 81          | 44   | 43          | 79         | <b>544</b> | 48         | 38         |
| HBOV     | 52         | 58         | 51          | 32         | 73         | 48         | 48          | 36         | 59         | 44          | 69         | 22         | 40          | 70          | 40   | 68          | 49         | 53         | <b>637</b> | 109        |
| HMPV     | 68         | 67         | 58          | 79         | 47         | 92         | 94          | 65         | 94         | 76          | 84         | 91         | 96          | 76          | 91   | 74          | 31         | 69         | 37         | <b>893</b> |

**Abbreviations:** AB: *Acinetobacter Baumannii*; AD: Adenovirus; CP: *Chlamydia Pneumonia*; Flu-A: Influenza A virus; H5: Influenza A virus subtype H5; HCMV: Human Cytomegalovirus; HMPV: Human Metapneumovirus; HBOV: Human Bocavirus; KP: *Klebsiella Pneumonia*; MP: *Mycoplasma Pneumonia*; N1: Influenza A virus subtype N1; PA: *Pseudomonas Aeruginosa*; PIV1: Human Parainfluenza Virus 1; PIV2: Human Parainfluenza Virus 2; PIV3: Human Parainfluenza Virus 3; RSV: Respiratory Syncytial Virus; SA: *Staphylococcus Aureus*; SARS: Severe Acute Respiratory Syndromes; SA-PE: Streptavidin- P-Phycoerythrin; SM: *Stenotrophomonas Maltophilia*; SP: *Streptococcus Pneumonia*.
